# Supplementary material for: Growth, characterization and theoretical analysis of α-SrGeO3 as a candidate mid-IR stimulated Raman scattering crystal
Source: Royal Society of Chemistry journal article supplement (doi:10.1039/d4tc03340j), 2024-01-01
Supplement: d4tc03340j1.pdf [file d4tc03340j1.pdf]

**Growth, characterization and theoretical analysis of  $\alpha$ -SrGeO<sub>3</sub> as a candidate  
mid-IR stimulated Raman scattering crystal**

Hailong Wang, Bin Li, Ying Zhou, Guimei Zheng, Xue Zhang and Songming Wan

**Table of Contents**

|                                                                                                                 |    |
|-----------------------------------------------------------------------------------------------------------------|----|
| Synthesis of polycrystalline raw materials for growth of the $\alpha$ -SrGeO <sub>3</sub> crystal.....          | S2 |
| Convergence test for the total energy of $\alpha$ -SrGeO <sub>3</sub> with respect to the $k$ -point grids..... | S3 |
| Convergence test for the total energy of $\alpha$ -SrGeO <sub>3</sub> with respect to the energy cutoffs.....   | S3 |
| Vibrational modes and their corresponding frequencies of the $\alpha$ -SrGeO <sub>3</sub> crystal.....          | S4 |
| Nine characteristic Raman vibrational modes of the $\alpha$ -SrGeO <sub>3</sub> crystal.....                    | S5 |

Synthesis of polycrystalline raw materials for growth of the  $\alpha$ -SrGeO<sub>3</sub> crystal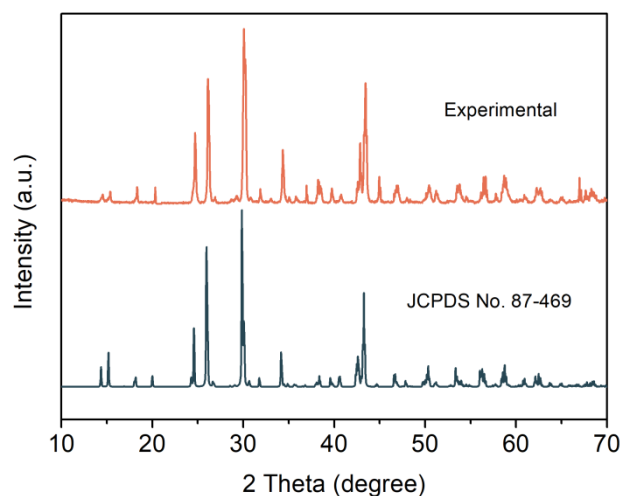

**Fig. S1** Experimental and standard patterns of  $\alpha$ -SrGeO<sub>3</sub> [Joint Committee on Powder Diffraction Standards (JCPDS) card No. 87-469].

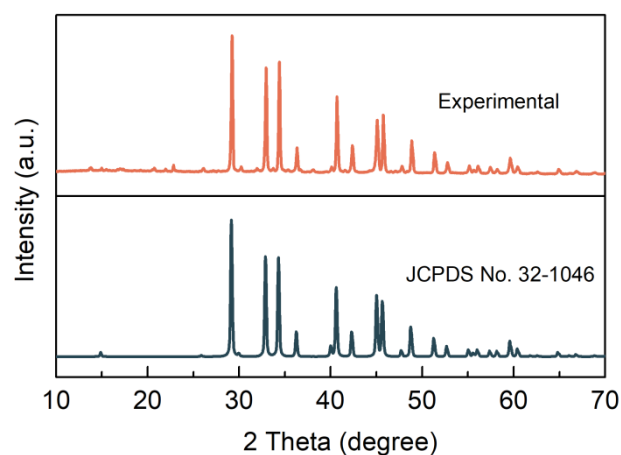

**Fig. S2** Experimental and standard patterns of NaBO<sub>2</sub> (JCPDS No. 32-1046).

Polycrystalline raw materials of  $\alpha$ -SrGeO<sub>3</sub> and NaBO<sub>2</sub> were synthesized via high-temperature solid-state reactions. All of the chemical reagents were commercially available and used without further treatment: (1) SrCO<sub>3</sub>, 99.0%, Sinopharm Chemical Reagent Co., Ltd.; (2) GeO<sub>2</sub>, 99.99%, Xiangkang Technology Development Co., Ltd., China; (3) Na<sub>2</sub>CO<sub>3</sub>, 99.8%, Sinopharm Chemical Reagent Co., Ltd.; (4) H<sub>3</sub>BO<sub>3</sub>, 99.5%, Yunling Chemical Reagent Co., China. The chemical reagents in stoichiometric ratios were weighed, mixed, and fully ground in a mortar. Then, the mixture was transferred to a corundum crucible and heated in a furnace. For  $\alpha$ -SrGeO<sub>3</sub>, the mixture was heated at 1000°C for 24 h with an intermediate grinding. For NaBO<sub>2</sub>, the mixture was heated at 600°C for the first 12 hours. Then, the obtained intermediate product was reground and calcined at 650°C for the second 12 hours.

The polycrystalline products were identified by the XRD technology. The results are shown in Figs. S1 and S2, responding to polycrystalline  $\alpha$ -SrGeO<sub>3</sub> and NaBO<sub>2</sub>, respectively. The consistency of the experimental and the standard patterns indicates that the synthesized products are  $\alpha$ -SrGeO<sub>3</sub> and NaBO<sub>2</sub>.

**Table S1.** Convergence test for the total energy of  $\alpha$ -SrGeO<sub>3</sub> with respect to the  $k$ -point grids (the energy cutoff is fixed at 1000 eV)

| $k$ -point            | total energy (eV) |
|-----------------------|-------------------|
| $1 \times 1 \times 1$ | -26906.6557       |
| $1 \times 2 \times 1$ | -26906.8228       |
| $1 \times 2 \times 2$ | -26906.8363       |

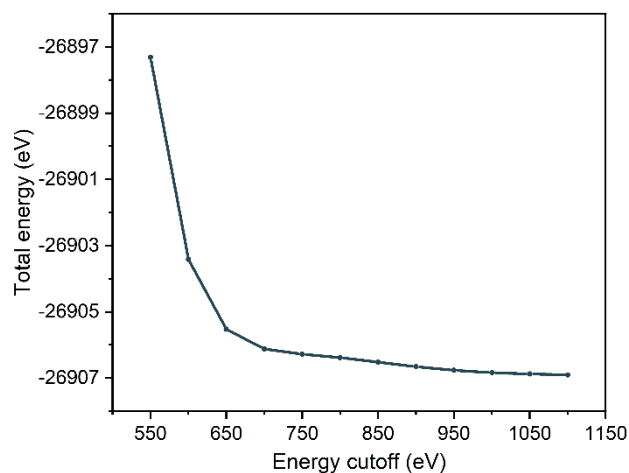**Fig. S3** Convergence test for the total energy of  $\alpha$ -SrGeO<sub>3</sub> with respect to the energy cutoffs. The  $k$ -point grid is fixed at  $1 \times 2 \times 1$ .

Table S1 and Fig. S3 display the results of convergence tests for the total energy of  $\alpha$ -SrGeO<sub>3</sub> with respect to the  $k$ -point grids and the energy cutoffs, respectively. The results indicate that a  $k$ -point grid of  $1 \times 2 \times 1$  and an energy cutoff of 1000 eV are sufficient to ensure the total energy convergence to within 1 meV/atom.

# Electronic Supplementary Information

**Table S2.** Vibrational modes and their corresponding frequencies of the  $\alpha$ -SrGeO<sub>3</sub> crystal

| No. | $\omega$ (cm <sup>-1</sup> ) | mode             | No. | $\omega$ (cm <sup>-1</sup> ) | mode           | No. | $\omega$ (cm <sup>-1</sup> ) | mode           |
|-----|------------------------------|------------------|-----|------------------------------|----------------|-----|------------------------------|----------------|
| 1   | -0.03                        | B <sub>u</sub> * | 31  | 147.52                       | B <sub>u</sub> | 61  | 360.34                       | A <sub>u</sub> |
| 2   | -0.02                        | B <sub>u</sub> * | 32  | 151.11                       | B <sub>g</sub> | 62  | 360.63                       | B <sub>g</sub> |
| 3   | -0.02                        | A <sub>u</sub> * | 33  | 154.72                       | B <sub>u</sub> | 63  | 375.14                       | A <sub>g</sub> |
| 4   | 65.49                        | B <sub>u</sub>   | 34  | 172.10                       | A <sub>u</sub> | 64  | 376.61                       | B <sub>u</sub> |
| 5   | 73.79                        | B <sub>g</sub>   | 35  | 176.42                       | B <sub>u</sub> | 65  | 392.33                       | B <sub>u</sub> |
| 6   | 78.64                        | A <sub>u</sub>   | 36  | 181.01                       | B <sub>g</sub> | 66  | 423.60                       | B <sub>g</sub> |
| 7   | 82.40                        | A <sub>u</sub>   | 37  | 192.22                       | B <sub>u</sub> | 67  | 471.68                       | A <sub>u</sub> |
| 8   | 84.23                        | B <sub>u</sub>   | 38  | 193.25                       | A <sub>g</sub> | 68  | 473.36                       | A <sub>g</sub> |
| 9   | 88.77                        | A <sub>g</sub>   | 39  | 195.24                       | A <sub>u</sub> | 69  | 493.50                       | A <sub>g</sub> |
| 10  | 94.22                        | B <sub>g</sub>   | 40  | 197.11                       | B <sub>g</sub> | 70  | 494.66                       | B <sub>u</sub> |
| 11  | 97.51                        | B <sub>g</sub>   | 41  | 243.90                       | A <sub>u</sub> | 71  | 497.05                       | A <sub>u</sub> |
| 12  | 98.44                        | A <sub>u</sub>   | 42  | 246.69                       | A <sub>g</sub> | 72  | 498.48                       | B <sub>g</sub> |
| 13  | 100.51                       | B <sub>u</sub>   | 43  | 254.64                       | A <sub>u</sub> | 73  | 736.43                       | B <sub>u</sub> |
| 14  | 103.76                       | B <sub>u</sub>   | 44  | 256.09                       | A <sub>g</sub> | 74  | 740.55                       | B <sub>g</sub> |
| 15  | 104.39                       | A <sub>g</sub>   | 45  | 262.67                       | B <sub>u</sub> | 75  | 741.98                       | A <sub>g</sub> |
| 16  | 109.51                       | A <sub>u</sub>   | 46  | 264.34                       | A <sub>u</sub> | 76  | 744.57                       | A <sub>u</sub> |
| 17  | 112.76                       | B <sub>u</sub>   | 47  | 265.45                       | B <sub>u</sub> | 77  | 775.75                       | B <sub>g</sub> |
| 18  | 113.98                       | B <sub>g</sub>   | 48  | 269.10                       | A <sub>u</sub> | 78  | 775.78                       | B <sub>u</sub> |
| 19  | 114.05                       | A <sub>g</sub>   | 49  | 270.77                       | A <sub>g</sub> | 79  | 803.59                       | A <sub>g</sub> |
| 20  | 119.54                       | B <sub>u</sub>   | 50  | 279.63                       | B <sub>g</sub> | 80  | 805.99                       | B <sub>u</sub> |
| 21  | 119.97                       | A <sub>u</sub>   | 51  | 281.72                       | B <sub>g</sub> | 81  | 807.40                       | A <sub>u</sub> |
| 22  | 121.05                       | B <sub>g</sub>   | 52  | 283.42                       | A <sub>g</sub> | 82  | 816.15                       | A <sub>u</sub> |
| 23  | 129.32                       | A <sub>g</sub>   | 53  | 302.86                       | B <sub>u</sub> | 83  | 821.40                       | B <sub>g</sub> |
| 24  | 132.53                       | A <sub>u</sub>   | 54  | 310.57                       | B <sub>g</sub> | 84  | 821.86                       | A <sub>g</sub> |
| 25  | 133.96                       | A <sub>g</sub>   | 55  | 312.83                       | A <sub>g</sub> | 85  | 823.30                       | B <sub>u</sub> |
| 26  | 137.84                       | B <sub>g</sub>   | 56  | 313.03                       | B <sub>u</sub> | 86  | 850.73                       | B <sub>u</sub> |
| 27  | 142.62                       | A <sub>u</sub>   | 57  | 316.44                       | A <sub>u</sub> | 87  | 850.91                       | B <sub>g</sub> |
| 28  | 142.88                       | B <sub>u</sub>   | 58  | 320.24                       | B <sub>g</sub> | 88  | 852.71                       | A <sub>g</sub> |
| 29  | 144.93                       | A <sub>g</sub>   | 59  | 354.01                       | A <sub>u</sub> | 89  | 853.37                       | A <sub>u</sub> |
| 30  | 145.19                       | B <sub>g</sub>   | 60  | 354.53                       | A <sub>g</sub> | 90  | 883.73                       | B <sub>g</sub> |

\*Acoustic modes

The Raman-active modes are highlighted in red.

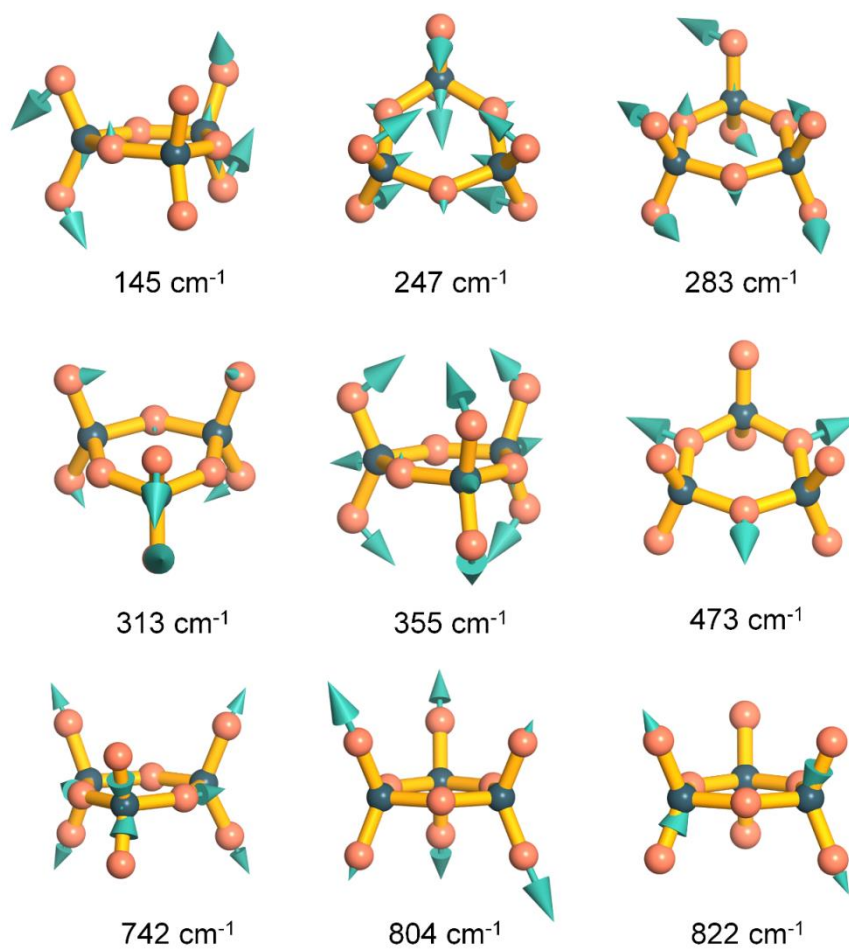

**Fig. S4** Nine characteristic Raman vibrational modes of the  $\alpha$ -SrGeO<sub>3</sub> crystal. All of the modes are the A<sub>g</sub> mode; all of the frequencies are the computational values given in Table S2.
